# Supplementary material for: Nitric oxide (NO) reactivity studies on mononuclear iron(ii) complexes supported by a tetradentate Schiff base ligand
Source: Royal Society of Chemistry journal article supplement (doi:10.1039/c6ra21659e), 2016-01-01
Supplement: c6ra21659e1.pdf [file c6ra21659e1.pdf]

## Nitric oxide (NO) reactivity studies on mononuclear Iron(II) complexes supported by a tetradentate Schiff base Ligand

Nidhi Tyagi,<sup>a</sup> Ovender Singh,<sup>a</sup> Udai P. Singh,<sup>a</sup> Kaushik Ghosh,<sup>a\*</sup>

<sup>a</sup>Department of Chemistry, Indian Institute of Technology Roorkee,  
Roorkee–247667, Uttarakhand INDIA.

**Fig. S1.** IR Spectra of the complexes **1** and **2**

**Fig. S2.** ESI-MS spectra of complexes (A) **1** and (B) **2**

**Fig. S3.** <sup>13</sup>C NMR spectra of **Gimpy** and complex **2**

**Fig. S4.** <sup>1</sup>H NMR spectra of ligand (**Gimpy**) and complex **2**

**Fig. S5.** *In-situ* UV-Visible spectral changes of complex **2** in presence of acidified NaNO<sub>2</sub>

**Fig. S6.** *In-situ* ESI-MS spectra of iron-nitrosyl complex [Fe(**Gimpy**)(NO)(CN)<sub>2</sub>]<sup>2+</sup>, **4**. 504

**Fig. S7.** Comparison of orientation of phenyl rings in (a)[Fe(**Gimpy**)(CN)<sub>2</sub>]**·**3H<sub>2</sub>O and (b)[Fe(**Gimpy**-NO<sub>2</sub>)(CN)<sub>2</sub>]**·**CH<sub>2</sub>Cl<sub>2</sub>

**Fig. S8.** Packing diagram of the complex **2**

**Fig. S9.** Geometry optimized structure of complexes **2** and **3**.

**Fig. S10.** Frontier orbitals diagram for the HOMO, HOMO-1, HOMO-2 and LUMO, LUMO+1, LUMO+2, for the complex **2** and **3**.

**Fig. S11.** UV-vis spectra of the complexes **2** and **3** obtained from TD-DFT calculation.

**Fig. S12.** Frontier orbitals diagram for ligand, **Gimpy**.

**Table S1.** Crystallographic parameters of the complexes **2** and **3**

**Table S2.** Electrochemical data for Fe(III)/Fe(II) redox couple at 298 K<sup>a</sup> vs Ag/AgCl.

**Table S3.** Cartesian coordinates for complex [Fe(**Gimpy**)(CN)<sub>2</sub>]

**Table S4.** Cartesian coordinates for complex [Fe(**Gimpy**-NO<sub>2</sub>)(CN)<sub>2</sub>]

**Table S5.** Bond distances (Å) and bond angles (°) for complexes **2** and **3** with optimized DFT bond parameters in gas.

**Table S6.** Calculated TD-DFT oscillator strengths (*f*) and nature of transitions in the complexes **2** and **3**

**Table S7.** Percentage orbitals contribution of complex [Fe(**Gimpy**)(CN)<sub>2</sub>]

**Table S8.** Percentage orbitals contribution of complex [Fe(**Gimpy**-NO<sub>2</sub>)(CN)<sub>2</sub>]

**Table S9.** Percentage contribution for ligand, **Gimpy**

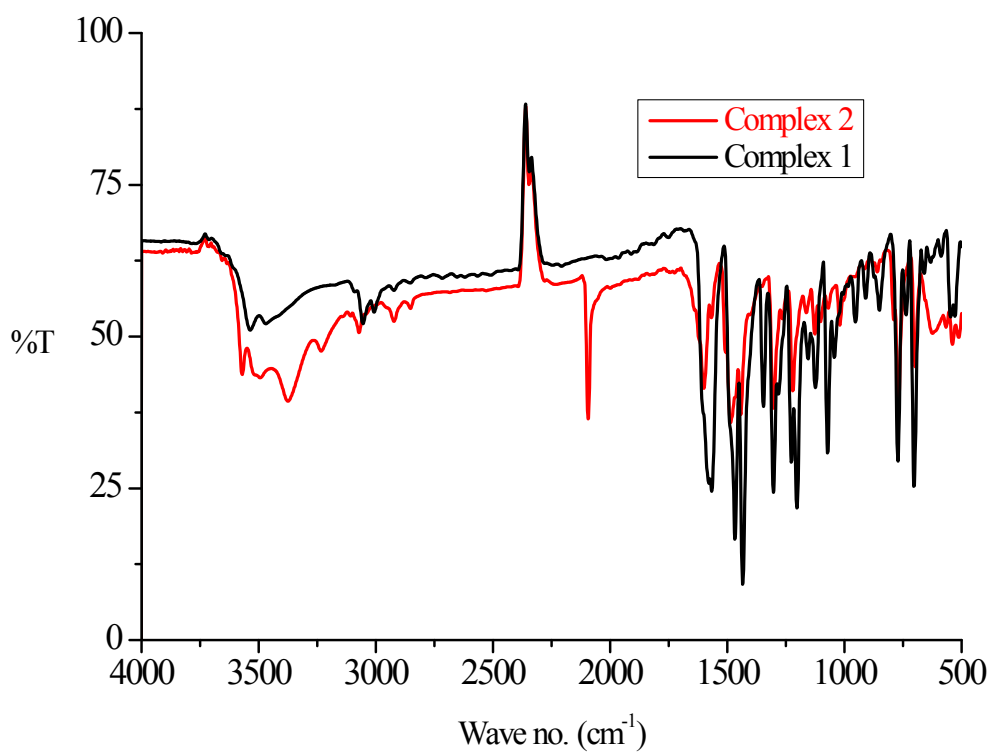

**Fig. S1.** IR Spectra of the complexes 1 and 2

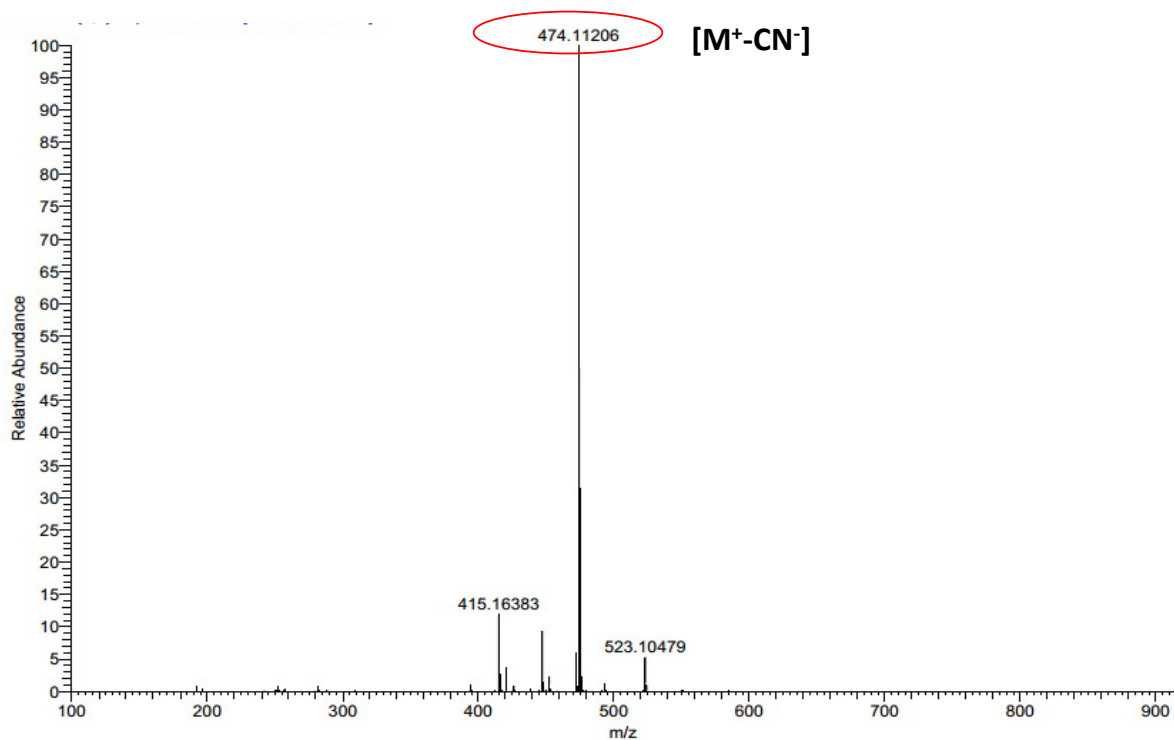

(A)

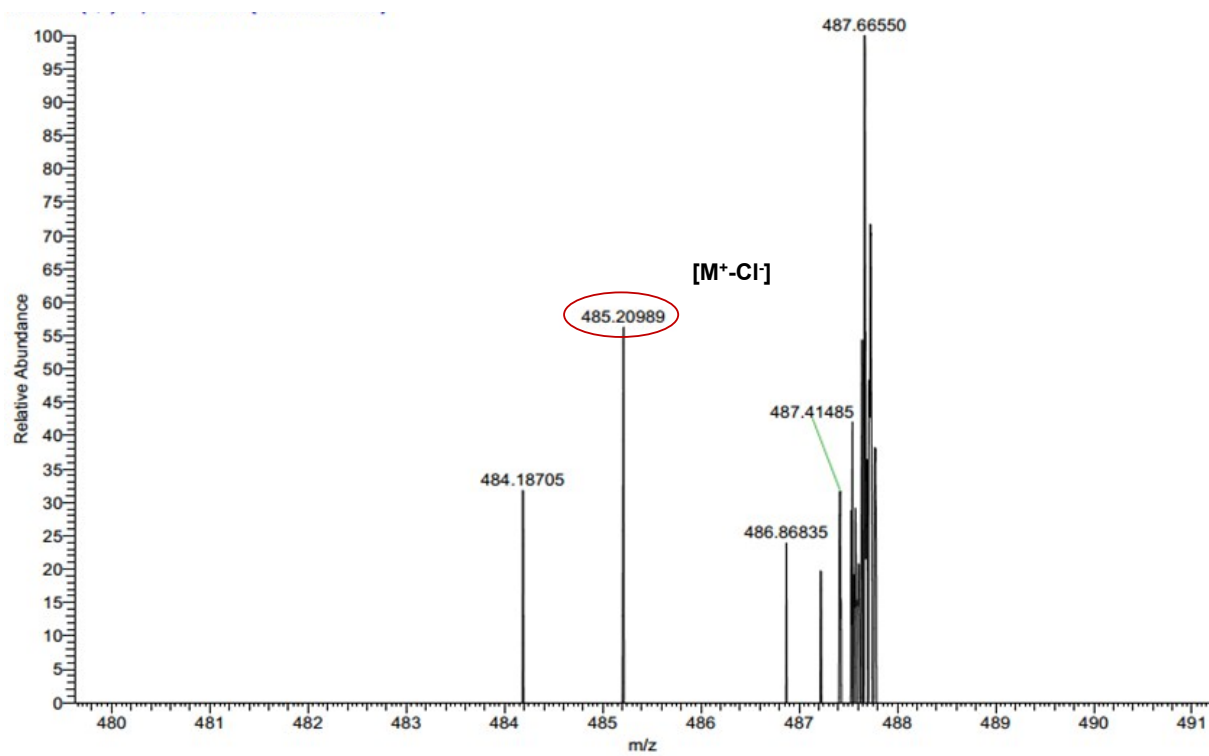

(B)

**Fig.S2.**ESI-MS spectra of complexes (A) 1 and (B)2.

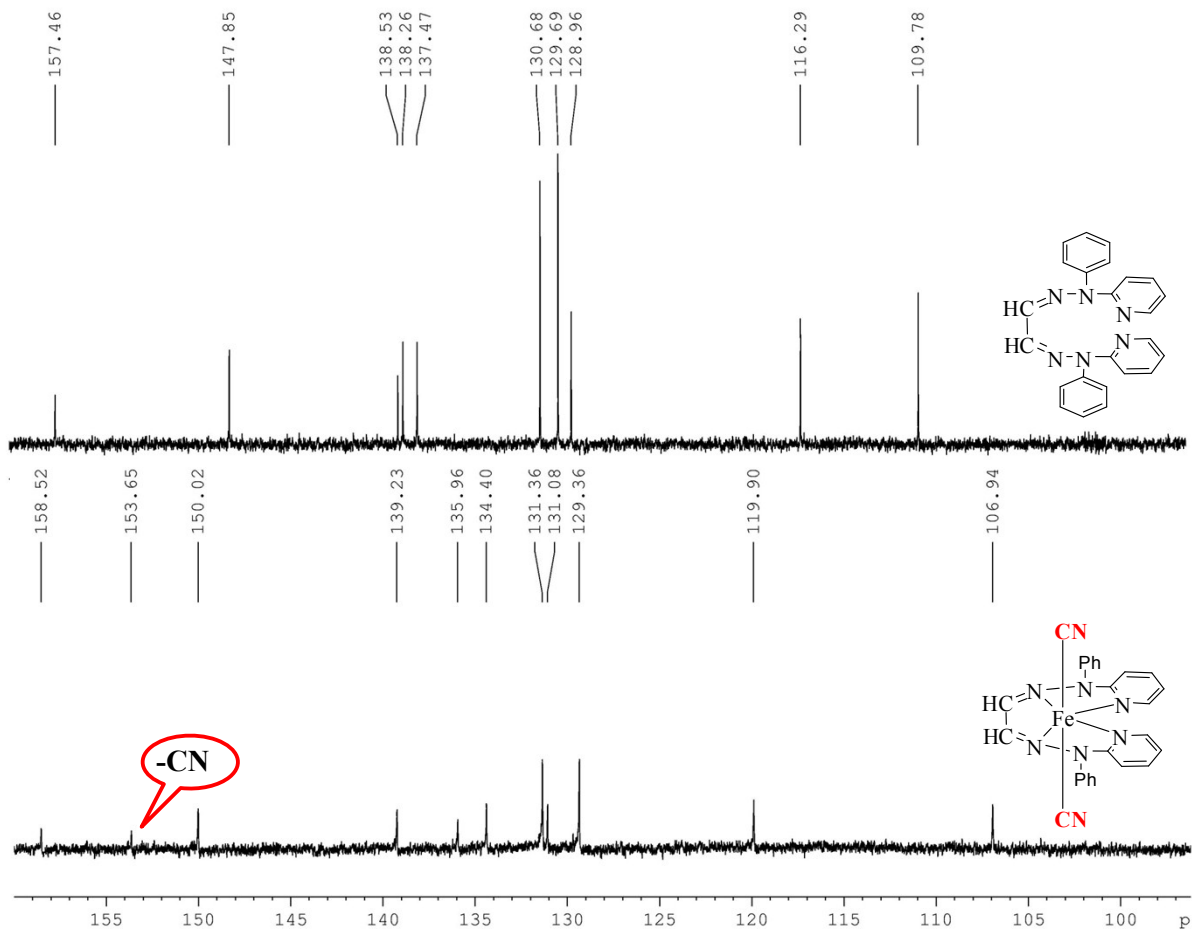

Fig. 3.  $^{13}\text{C}$  NMR spectra of Gimpy and complex 2.

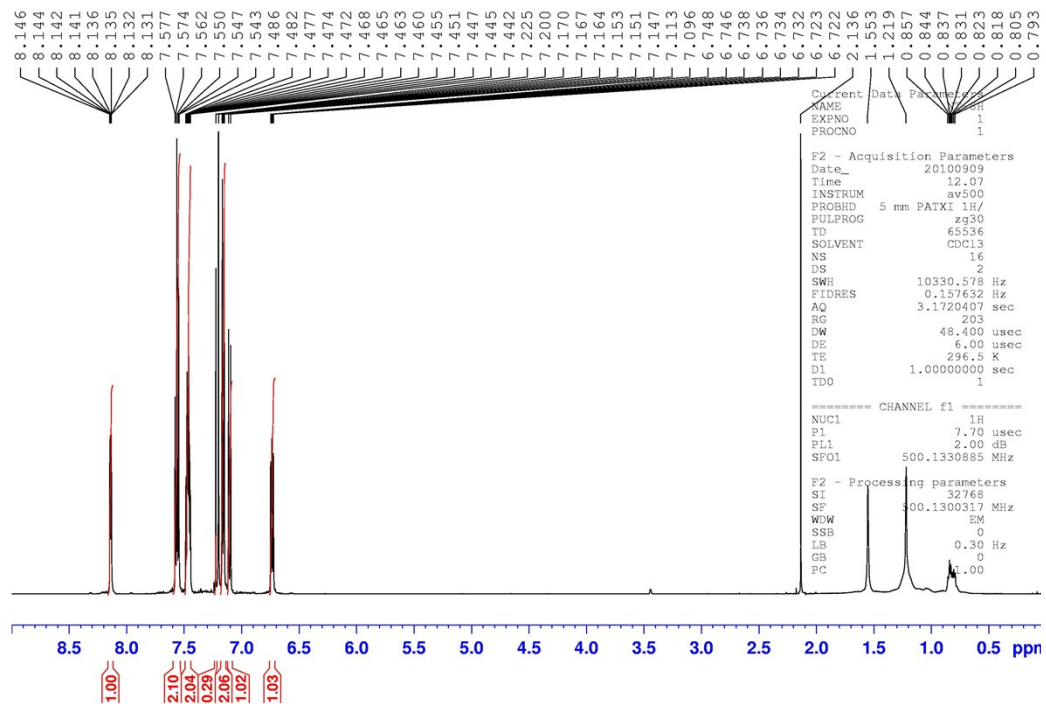

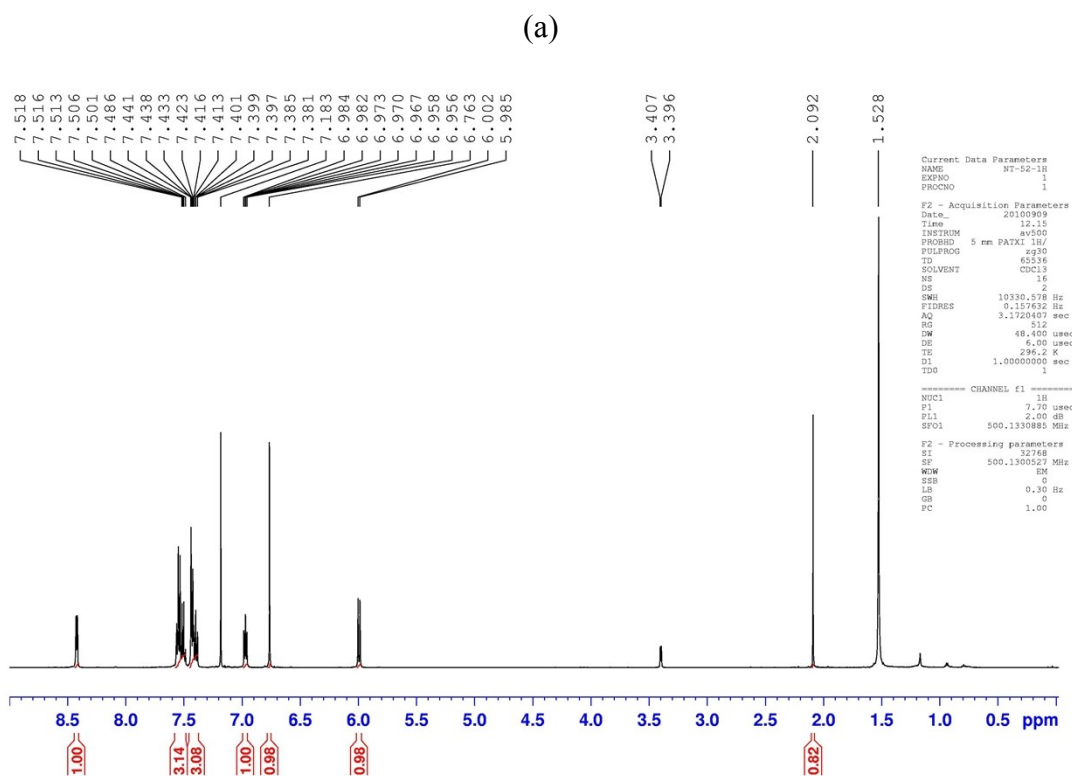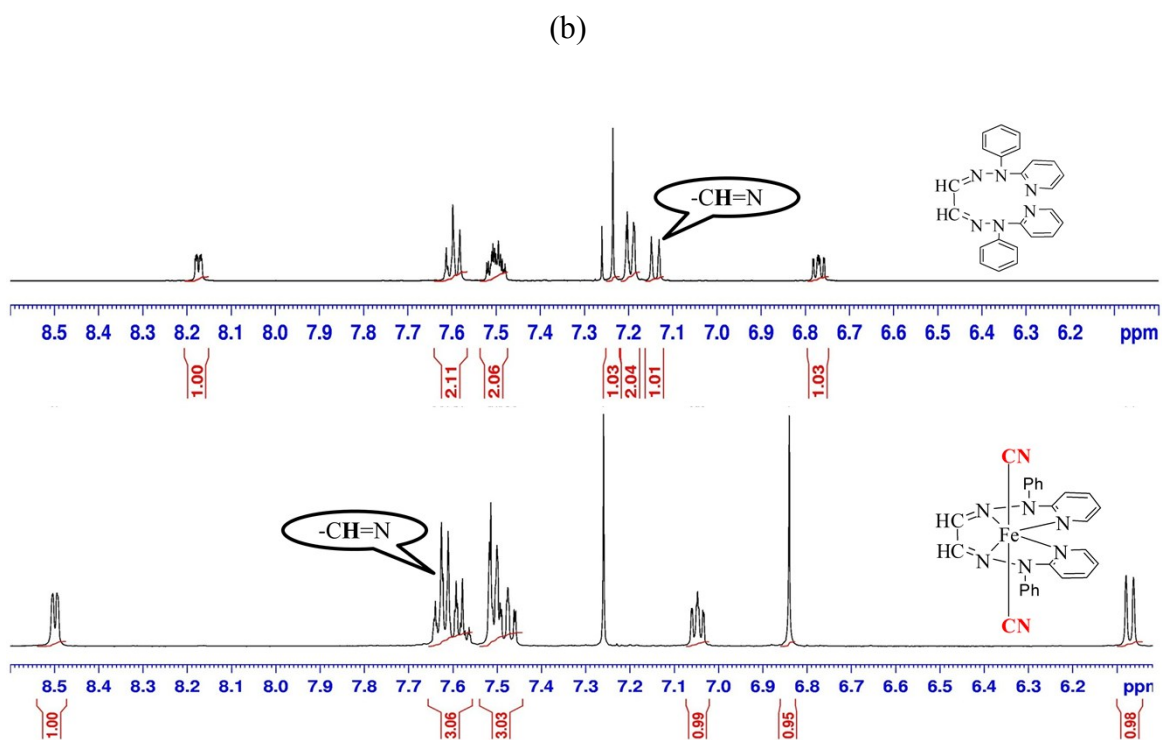

**Fig.S4.**  $^1\text{H}$  NMR spectra of (a) ligand (**Gimpy**), (b) complex **2** and (c) expanded  $^1\text{H}$  NMR spectra of ligand and complex **2**.

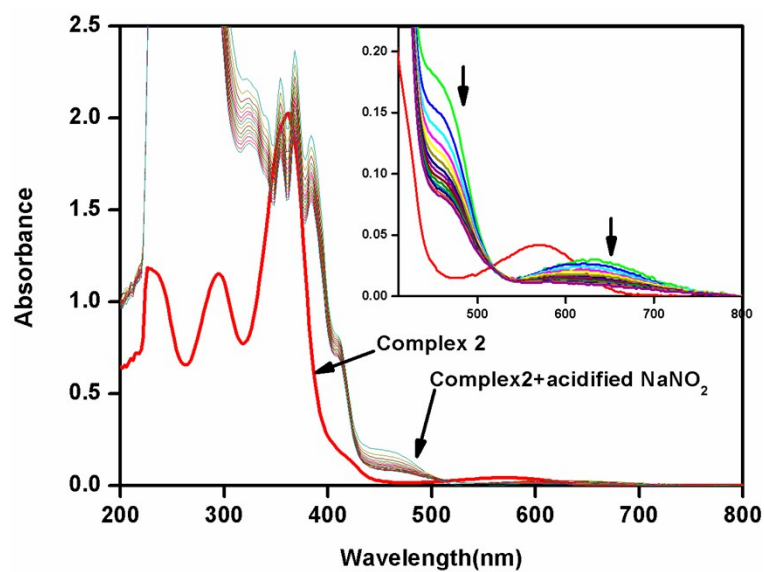

Fig. S5. *In-situ* UV-Visible spectral changes of complex 2 in presence of acidified NaNO<sub>2</sub>

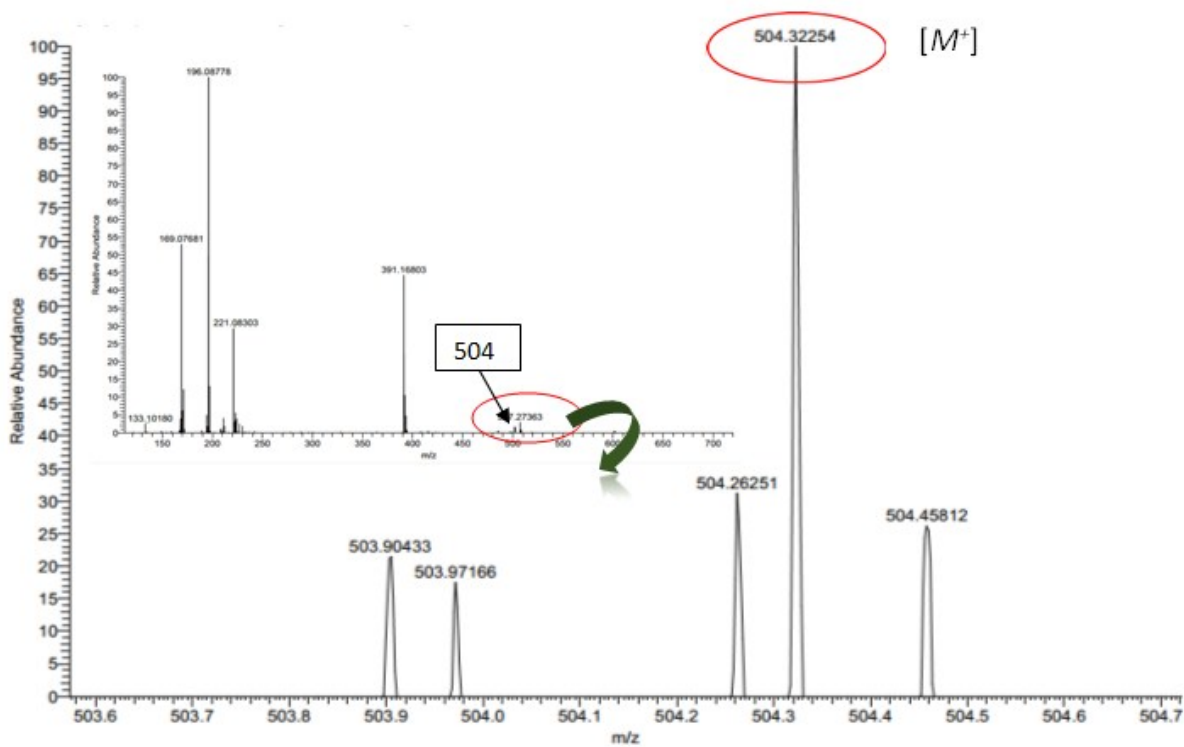

Fig. S6. *In-situ* ESI-MS spectra of iron-nitrosyl complex [Fe(Gimpy)(NO)(CN)]<sup>2+</sup>, 4. 504

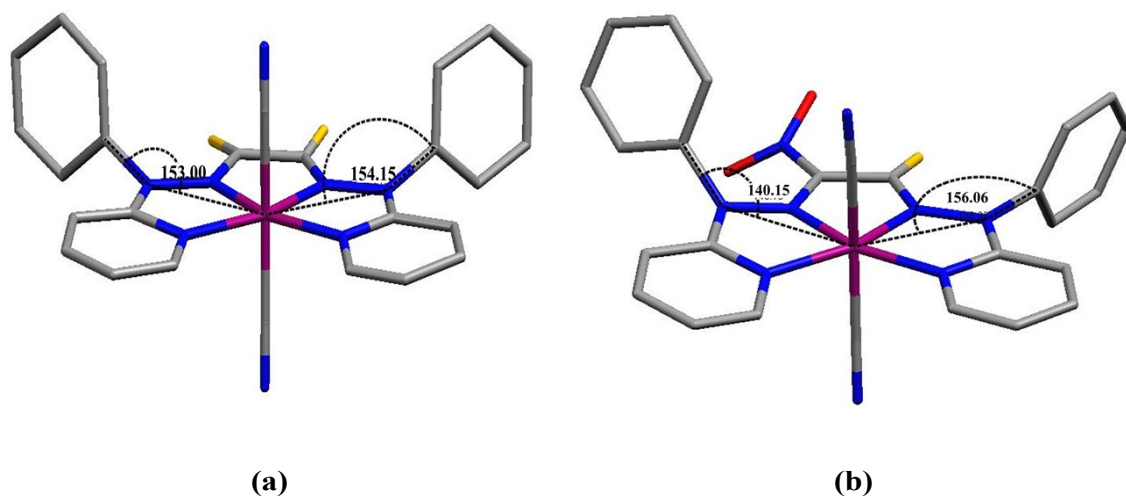

**Fig. S7.** Comparison of orientation of phenyl rings in **(a)** $[\text{Fe}(\text{Gimpy})(\text{CN})_2] \cdot 3\text{H}_2\text{O}$  and **(b)** $[\text{Fe}(\text{Gimpy-NO}_2)(\text{CN})_2] \cdot \text{CH}_2\text{Cl}_2$

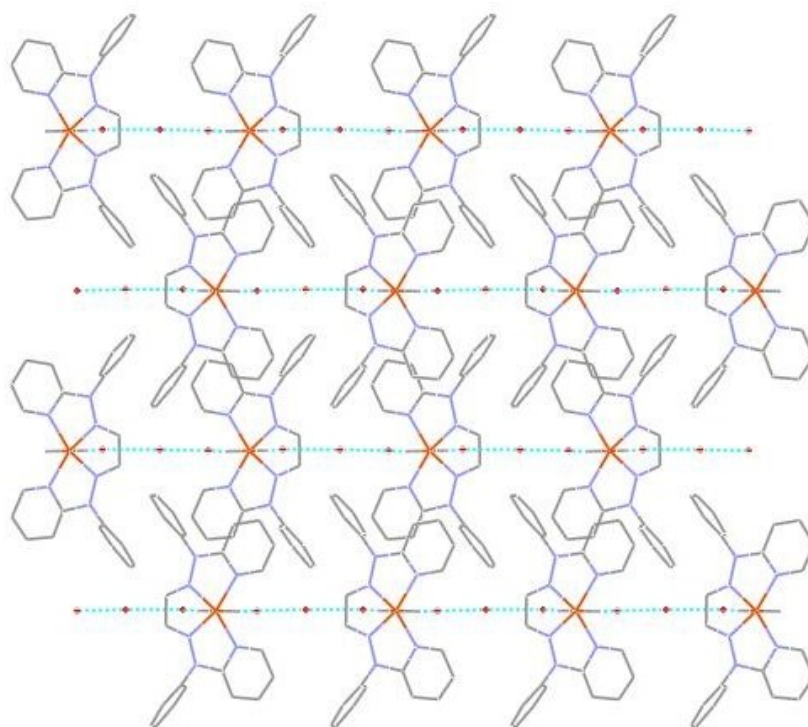

**Fig. S8.** Packing diagram of complex 2 along c axis

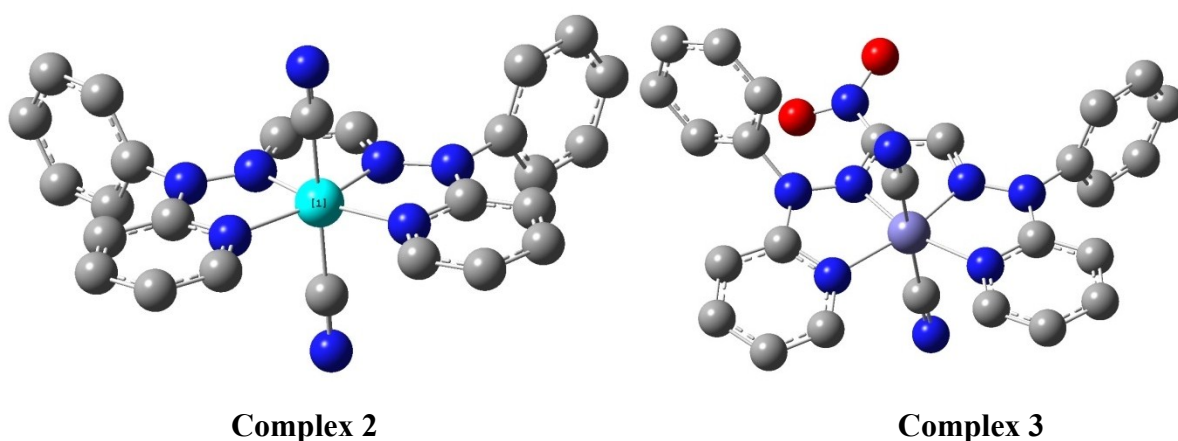

**Complex 2**

**Complex 3**

**Fig. S9.** Geometry optimized structure for complexes 2 and 3



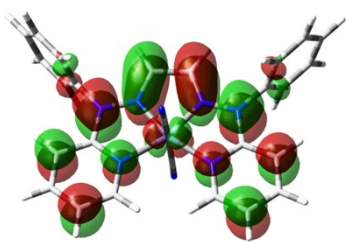

**HOMO**

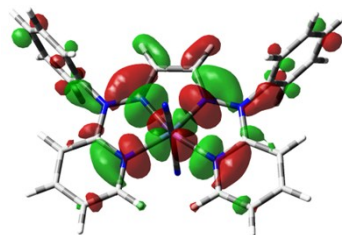

**LUMO**

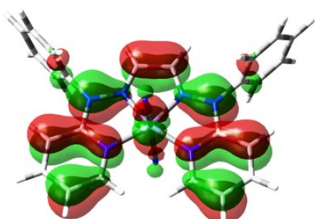

**HOMO-1**

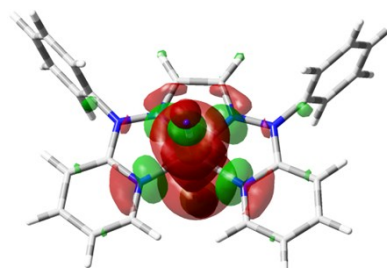

**LUMO+1**

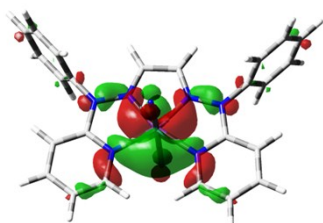

**HOMO-2**

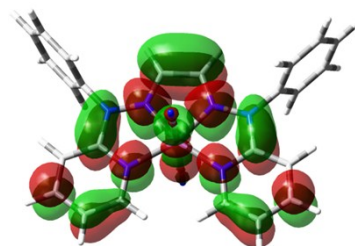

**LUMO+2**

**(a)**

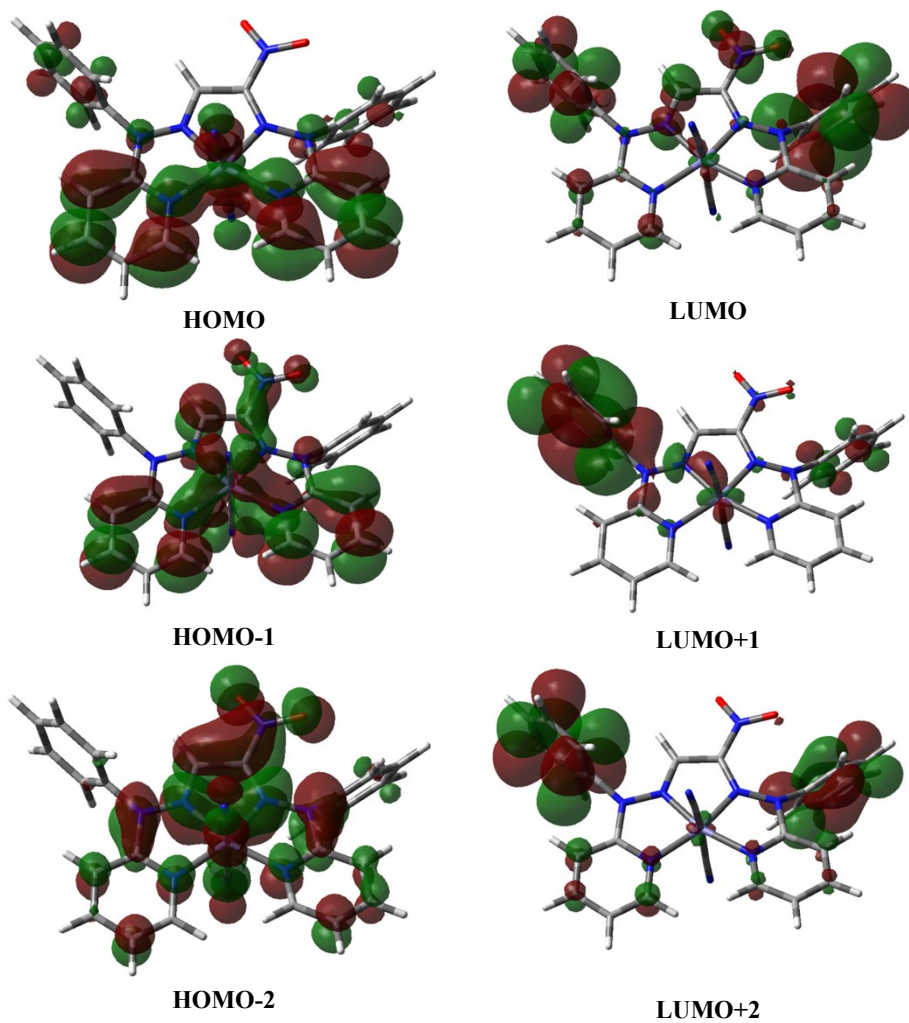

**Fig. S10.** Frontier orbitals diagram for the HOMO, HOMO-1, HOMO-2, and LUMO, LUMO+1, LUMO+2, of (a) complex 2 (b) complex 3.

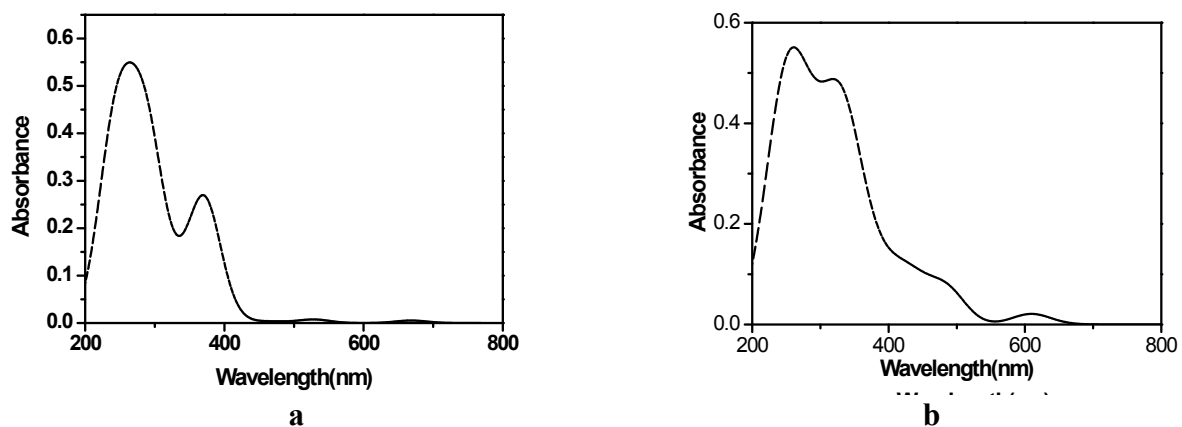

**Fig. S11.** UV-vis spectra of complexes a) 2 and b) 3 obtained from TD-DFT calculation

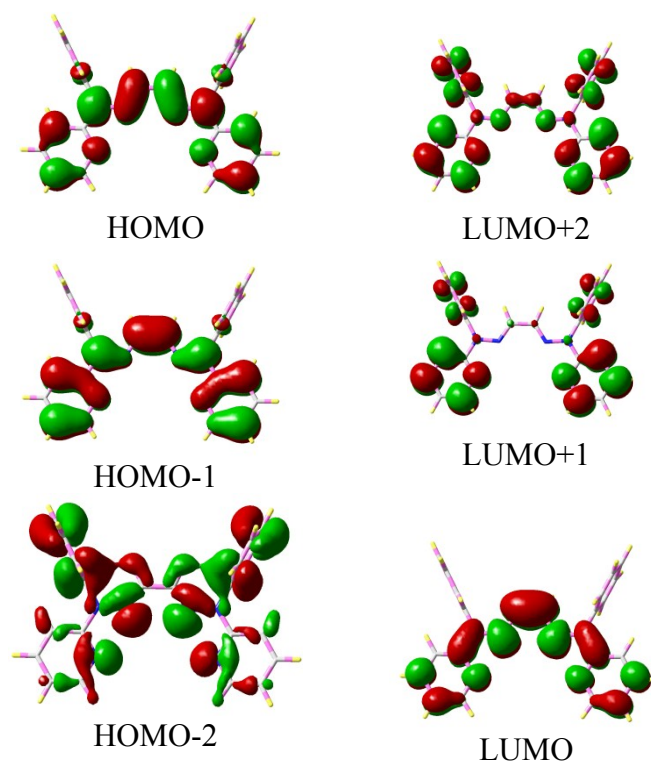

**Fig. S12.** Frontier orbitals diagram for ligand, **Gimpy**.

**Table S1.** Crystallographic parameters of complex **2** and **3**

| Complex                                                          | Complex 2                                   | Complex 3                                   |
|------------------------------------------------------------------|---------------------------------------------|---------------------------------------------|
| <b>Colour</b>                                                    | purple                                      | green                                       |
| <b>Formula weight [g mol<sup>-1</sup>]</b>                       | 554.40                                      | 661.31                                      |
| <b>Temperature [K]</b>                                           | 293(2)                                      | 293(2)                                      |
| <b><math>\lambda</math> [Å] (Mo-K<math>\alpha</math>)</b>        | 0.71073                                     | 0.71073                                     |
| <b>Crystal system</b>                                            | orthorhombic                                | Triclinic                                   |
| <b>Space group</b>                                               | <i>Pn21a</i>                                | <i>P-1</i>                                  |
| <b>a [Å]</b>                                                     | 16.979(5)                                   | 9.885(4)                                    |
| <b>b [Å]</b>                                                     | 15.130(5)                                   | 12.712(5)                                   |
| <b>c [Å]</b>                                                     | 10.163(5)                                   | 13.207(5)                                   |
| <b><math>\alpha</math> [°]</b>                                   | 90.000(5)                                   | 94.82(2)                                    |
| <b><math>\beta</math> [°]</b>                                    | 90.000(5)                                   | 111.057(19)                                 |
| <b><math>\gamma</math> [°]</b>                                   | 90.000(5)                                   | 101.56(2)                                   |
| <b>V [Å<sup>3</sup>]</b>                                         | 2610.8(17)                                  | 1495.1(11)                                  |
| <b>Crystal size [mm]</b>                                         | 0.28 x 0.19 x 0.10                          | 0.29 x 0.19 x 0.11                          |
| <b>Z</b>                                                         | 4                                           | 2                                           |
| <b><math>\rho_{\text{calc}}</math> [gcm<sup>-3</sup>]</b>        | 1.373                                       | 1.469                                       |
| <b>F(000)</b>                                                    | 1152.0                                      | 678                                         |
| <b><math>\theta</math> range for data Collection</b>             | 2.34-28.33                                  | 1.66-22.88                                  |
| <b>Index ranges</b>                                              | -22<h<22,<br>-19<k<19, -13<l<13             | -10<h<10,<br>-13<k<13, -14<l<14             |
| <b>Refinement method</b>                                         | Full matrix least-squares on F <sup>2</sup> | Full matrix least-squares on F <sup>2</sup> |
| <b>Data/restraints/parameters</b>                                | 6180/1/375                                  | 3809/0/384                                  |
| <b>GOF on F<sup>2</sup></b>                                      | 0.813                                       | 1.085                                       |
| <b>R<sub>1</sub><sup>b</sup>[I&gt;2<math>\sigma</math>(I)]</b>   | 0.0367                                      | 0.0842                                      |
| <b>R<sub>1</sub>[all data]</b>                                   | 0.0582                                      | 0.1754                                      |
| <b>wR<sub>2</sub><sup>c</sup>[I&gt; 2<math>\sigma</math>(I)]</b> | 0.0964                                      | 0.2154                                      |
| <b>wR<sub>2</sub> [all data]</b>                                 | 0.1160                                      | 0.2650                                      |

<sup>a</sup>GOF =  $[\sum[w(F_o^2 - F_c^2)^2] / (M - N)]^{1/2}$  (M = number of reflections, N = number of parameters refined). <sup>b</sup>R<sub>1</sub> =  $\sum \|F_o\| - \|F_c\| / \sum \|F_o\|$ , <sup>c</sup>wR<sub>2</sub> =  $[\sum[w(F_o^2 - F_c^2)^2] / \sum [w(F_o^2)^2]]^{1/2}$

**Table S2.**Electrochemical data for Fe(III)/Fe(II) redox couple at 298 K<sup>a</sup>vsAg/AgCl

| Complex  | Fe(III)/Fe(II)     |                    |                                                                       |
|----------|--------------------|--------------------|-----------------------------------------------------------------------|
|          | E <sub>pa</sub> /V | E <sub>pc</sub> /V | E <sub>1/2</sub> <sup>b</sup> , V (ΔE <sub>p</sub> <sup>c</sup> , mV) |
| <b>1</b> | -0.082             | -0.435             | -                                                                     |
| <b>2</b> | 0.860              | 0.703              | 0.782 (157)                                                           |
| <b>3</b> | 1.210              | 1.120              | 1.165 (90)                                                            |

<sup>a</sup>measured in dichloromethane for **1**, **2** and **3** with 0.1 M tetrabutylammonium perchlorate (TBAP).<sup>b</sup>Data from cyclic voltammetric measurements; E<sub>1/2</sub> is calculated as average of anodic (E<sub>pa</sub>) and cathodic (E<sub>pc</sub>) peak potentials E<sub>1/2</sub> = 1/2(E<sub>pa</sub>+E<sub>pc</sub>); and <sup>c</sup>ΔE<sub>p</sub> = E<sub>pa</sub>-E<sub>pc</sub> at scan rate 0.1 V/s.

**Table S3: Cartesian coordinates for complex [Fe(Gimpy)(CN)<sub>2</sub>]**

Atom types=4

Charge=26.0 Atoms=1

Fe 0.000099000 0.732841000 0.000149000

Charge=7.0 Atoms=8

N 1.728058000 1.817882000 0.009819000

N 2.575749000 -0.372278000 0.005649000

N 1.229650000 -0.688409000 0.004019000

N -1.229400000 -0.688460000 -0.003171000

N -2.575501000 -0.372380000 -0.005201000

N -1.727912000 1.817820000 -0.010061000

N 0.015529000 0.974061000 -3.143391000

N -0.019011000 0.977331000 3.143389000

Charge=6.0 Atoms=26

C 0.010789000 0.879341000 -1.954611000

C -0.011101000 0.880631000 1.954789000

C 1.909508000 3.158572000 0.016469000

C 3.176358000 3.755702000 0.021079000

|   |              |              |              |
|---|--------------|--------------|--------------|
| C | 4.308628000  | 2.917163000  | 0.018999000  |
| C | 4.140749000  | 1.527033000  | 0.013429000  |
| C | 2.828919000  | 1.007752000  | 0.009389000  |
| C | -1.909432000 | 3.158490000  | -0.017131000 |
| C | -3.176312000 | 3.755569000  | -0.022141000 |
| C | -4.308542000 | 2.916979000  | -0.019991000 |
| C | -4.140591000 | 1.526849000  | -0.013931000 |
| C | -2.828741000 | 1.007630000  | -0.009511000 |
| C | -0.721850000 | -1.913159000 | -0.000801000 |
| C | 0.722160000  | -1.913139000 | 0.002089000  |
| C | 5.075341000  | -2.892997000 | 1.209839000  |
| C | 4.088370000  | -1.890017000 | 1.220919000  |
| C | 3.600850000  | -1.386938000 | -0.001261000 |
| C | 4.080340000  | -1.880477000 | -1.230561000 |
| C | 5.067271000  | -2.883507000 | -1.233721000 |
| C | -4.087580000 | -1.890401000 | -1.220761000 |
| C | -3.600560000 | -1.387081000 | 0.001519000  |
| C | -4.080510000 | -1.880411000 | 1.230719000  |
| C | -5.067399000 | -2.883481000 | 1.233689000  |
| C | -5.564499000 | -3.388782000 | 0.015369000  |
| C | -5.074529000 | -2.893401000 | -1.209871000 |
| C | 5.564861000  | -3.388577000 | -0.015511000 |

Charge=1.0 Atoms=20

|   |             |             |             |
|---|-------------|-------------|-------------|
| H | 1.011128000 | 3.761691000 | 0.018849000 |
| H | 3.267887000 | 4.836192000 | 0.026219000 |

|   |              |              |              |
|---|--------------|--------------|--------------|
| H | 5.309448000  | 3.339903000  | 0.022159000  |
| H | 4.992549000  | 0.857533000  | 0.012469000  |
| H | -1.011092000 | 3.761670000  | -0.019501000 |
| H | -3.267893000 | 4.836049000  | -0.027611000 |
| H | -5.309382000 | 3.339648000  | -0.023441000 |
| H | -4.992361000 | 0.857309000  | -0.012861000 |
| H | 5.458511000  | -3.283857000 | 2.148719000  |
| H | 3.696170000  | -1.496707000 | 2.155369000  |
| H | 3.681960000  | -1.479857000 | -2.159271000 |
| H | 5.444231000  | -3.267027000 | -2.178121000 |
| H | -3.695020000 | -1.497251000 | -2.155121000 |
| H | -3.682500000 | -1.479601000 | 2.159519000  |
| H | -5.444709000 | -3.266852000 | 2.178009000  |
| H | -6.327329000 | -4.163382000 | 0.020729000  |
| H | -5.457319000 | -3.284452000 | -2.148831000 |
| H | 6.327721000  | -4.163146000 | -0.021021000 |
| H | -1.316989000 | -2.818400000 | -0.000631000 |
| H | 1.317331000  | -2.818349000 | 0.002119000  |

**Table S4: Cartesian coordinates for complex [Fe(Gimpy-NO<sub>2</sub>)(CN)<sub>2</sub>]**

**Atom types=5**

**Charge=26.0 Atoms=1**

**Fe -0.109501000 0.910856000 -0.119861000**

**Charge=8.0 Atoms=2**

**O 2.345968000 -2.852464000 -1.510872000**

**O 0.641445000 -4.012520000 -0.560680000**

**Charge=7.0 Atoms=9**

**N 1.130481000 -0.456366000 -0.419574000**

**N 2.467333000 -0.112732000 -0.407177000**

**N -1.335973000 -0.513058000 -0.044317000**

**N -2.662003000 -0.207827000 0.175303000**

**N -1.785594000 1.960471000 0.377823000**

**N 1.243588000 -2.911311000 -0.854975000**

**N 0.593110000 0.857848000 2.948424000**

**N -0.938494000 1.522902000 -3.091251000**

**N 1.520544000 2.050879000 -0.403349000**

**Charge=6.0 Atoms=26**

**C 1.618133000 3.394937000 -0.538458000**

**C 2.848793000 4.046938000 -0.674143000**

**C 4.022866000 3.267704000 -0.677479000**

**C 3.929896000 1.873781000 -0.576536000**

**C 2.652099000 1.295228000 -0.455728000**

**C 0.584361000 -1.682567000 -0.488510000**

**C -0.846869000 -1.713290000 -0.278622000**

**C -2.889227000 1.157100000 0.412807000**

**C -4.174721000 1.665397000 0.690232000**

**C -4.306786000 3.034059000 0.954566000**

**C -3.164894000 3.860349000 0.947633000**

**C -1.926248000 3.277713000 0.655314000**

**C 3.491568000 -0.955812000 0.204303000**



|   |              |              |              |
|---|--------------|--------------|--------------|
| C | 3.390769000  | -1.224477000 | 1.583590000  |
| C | 4.396721000  | -1.991905000 | 2.199272000  |
| C | 5.489614000  | -2.465583000 | 1.447664000  |
| C | 5.577360000  | -2.180018000 | 0.070244000  |
| C | 4.571888000  | -1.427231000 | -0.559259000 |
| C | -3.702976000 | -1.203113000 | 0.062739000  |
| C | -4.087638000 | -1.940015000 | 1.199004000  |
| C | -5.085961000 | -2.924005000 | 1.075171000  |
| C | -5.687081000 | -3.165807000 | -0.176289000 |
| C | -5.290929000 | -2.426019000 | -1.308867000 |
| C | -4.293252000 | -1.440957000 | -1.194311000 |
| C | 0.301810000  | 0.890932000  | 1.793343000  |
| C | -0.596908000 | 1.272476000  | -1.977739000 |

Charge=1.0 Atoms=19

|   |              |              |              |
|---|--------------|--------------|--------------|
| H | 0.685095000  | 3.943325000  | -0.551951000 |
| H | 2.882859000  | 5.126030000  | -0.775431000 |
| H | 4.997374000  | 3.737693000  | -0.772670000 |
| H | 4.813639000  | 1.249126000  | -0.592802000 |
| H | -1.417678000 | -2.629968000 | -0.331012000 |
| H | -5.032423000 | 1.003747000  | 0.700953000  |
| H | -5.286790000 | 3.449207000  | 1.171836000  |
| H | -3.228784000 | 4.920610000  | 1.165081000  |
| H | -1.017274000 | 3.865277000  | 0.656963000  |
| H | 2.559776000  | -0.825906000 | 2.161541000  |
| H | 4.329868000  | -2.205116000 | 3.262657000  |

|   |              |              |              |
|---|--------------|--------------|--------------|
| H | 6.264840000  | -3.056028000 | 1.929654000  |
| H | 6.411829000  | -2.558068000 | -0.514087000 |
| H | 4.595918000  | -1.241716000 | -1.628357000 |
| H | -3.609853000 | -1.742378000 | 2.155131000  |
| H | -5.389042000 | -3.498264000 | 1.946394000  |
| H | -6.455992000 | -3.928511000 | -0.269331000 |
| H | -5.751651000 | -2.616994000 | -2.274200000 |
| H | -3.969270000 | -0.864992000 | -2.057568000 |

**Table S5.** Selected bond distances (Å) for complexes **2** and **3** with optimized DFT bond parameters in gas phase.

| Bond distances (Å) |         |           |         |
|--------------------|---------|-----------|---------|
| Complex 2          |         | Complex 3 |         |
| Fe1-N6             | 2.04042 | Fe1-N1    | 2.00924 |
| Fe1-N4             | 1.87929 | Fe1-N3    | 1.86994 |
| Fe1-N3             | 1.87930 | Fe1-N4    | 1.88082 |
| Fe1-N1             | 2.04041 | Fe1-N6    | 2.03928 |

**Table S6.** Calculated TD-DFT oscillator strengths (*f*) and nature of transitions in the complexes **2** and **3**

|                  | $\lambda_{\max}(\text{nm})$ | <i>f</i>      | Transition      | Significant contribution | Energy for transition |
|------------------|-----------------------------|---------------|-----------------|--------------------------|-----------------------|
| <b>Complex 2</b> | 370                         | 0.2274        | HOMO-1 → LUMO+1 | 19.6%                    | 3.3466eV              |
| <b>Complex 3</b> | 609                         | 0.0210        | HOMO-1 → LUMO   | 70%                      | 2.0350 eV             |
|                  |                             |               | HOMO-2 → LUMO   | 2.2%                     |                       |
|                  | 484                         | 0.0691        | HOMO → LUMO     | 11%                      | 2.5615 eV             |
|                  |                             |               | HOMO-3 → LUMO   | 42%                      |                       |
|                  | 430                         | 0.0721        | HOMO → LUMO+1   | 63%                      | 2.8806 eV             |
|                  |                             | HOMO-1 → LUMO | 3.2%            |                          |                       |
|                  | 326                         | 0.1120        | HOMO → LUMO+1   | 2.14%                    | 3.7927 eV             |

**Table S7. Percentage orbitals contribution of complex [Fe(Gimpy)(CN)<sub>2</sub>]**

| Orbitals | Fe | CN-1 | CN-2 | Py-1 | Py-2 | Ph-1 | Ph-2 | Nimi-1 | Nimi-2 | Main bond type    |
|----------|----|------|------|------|------|------|------|--------|--------|-------------------|
| LUMO+3   | 2  | 0    | 0    | 34   | 33   | 13   | 14   | 2      | 2      | d(Fe)+ $\pi^*(L)$ |
| LUMO+2   | 0  | 0    | 0    | 0    | 0    | 48   | 46   | 2      | 2      | $\pi^*(L)$        |
| LUMO+1   | 1  | 0    | 0    | 37   | 38   | 11   | 11   | 1      | 1      | d(Fe)+ $\pi^*(L)$ |
| LUMO     | 9  | 3    | 3    | 14   | 14   | 0    | 0    | 28     | 28     | d(Fe)+ $\pi^*(L)$ |
| HOMO     | 51 | 3    | 3    | 6    | 6    | 0    | 0    | 15     | 15     | d(Fe)+ $\pi(L)$   |
| HOMO-1   | 65 | 10   | 10   | 1    | 1    | 0    | 0    | 6      | 6      | d(Fe)+ $\pi(L)$   |
| HOMO-2   | 84 | 2    | 2    | 3    | 3    | 1    | 1    | 2      | 2      | d(Fe)+ $\pi(L)$   |
| HOMO-3   | 18 | 13   | 13   | 11   | 11   | 1    | 1    | 15     | 15     | d(Fe)+ $\pi(L)$   |

**Table S8. Percentage orbitals contribution of complex [Fe(Gimpy-NO<sub>2</sub>)(CN)<sub>2</sub>]**

| Orbitals | Fe | CN-1 | CN-2 | Py-1 | Py-2 | Ph-1 | Ph-2 | NO2 | Nimi-1 | Nimi-2 | Main bond type    |
|----------|----|------|------|------|------|------|------|-----|--------|--------|-------------------|
| LUMO+3   | 2  | 0    | 0    | 61   | 21   | 8    | 0    | 1   | 2      | 5      | d(Fe)+ $\pi^*(L)$ |
| LUMO+2   | 2  | 0    | 0    | 23   | 70   | 2    | 1    | 0   | 1      | 1      | d(Fe)+ $\pi^*(L)$ |
| LUMO+1   | 3  | 1    | 1    | 17   | 6    | 0    | 1    | 31  | 7      | 32     | d(Fe)+ $\pi^*(L)$ |
| LUMO     | 12 | 2    | 2    | 2    | 6    | 0    | 1    | 45  | 27     | 3      | d(Fe)+ $\pi^*(L)$ |
| HOMO     | 42 | 3    | 2    | 9    | 4    | 1    | 1    | 4   | 13     | 20     | d(Fe)+ $\pi(L)$   |
| HOMO-1   | 65 | 11   | 10   | 1    | 3    | 0    | 1    | 1   | 8      | 5      | d(Fe)+ $\pi(L)$   |
| HOMO-2   | 51 | 15   | 10   | 7    | 5    | 1    | 1    | 0   | 6      | 6      | d(Fe)+ $\pi(L)$   |
| HOMO-3   | 52 | 6    | 5    | 10   | 6    | 1    | 5    | 0   | 6      | 9      | d(Fe)+ $\pi(L)$   |

**Table S9. Percentage contribution of ligand, Gimpy**

| Orbitals | Nimine1 | Nimine2 | Phenyl1 | Phenyl2 | Pyridine1 | Pyridine2 |
|----------|---------|---------|---------|---------|-----------|-----------|
| LUMO+2   | 4       | 4       | 13      | 13      | 33        | 33        |
| LUMO+1   | 1       | 1       | 7       | 7       | 43        | 43        |
| LUMO     | 32      | 32      | 0       | 0       | 17        | 17        |
| HOMO     | 34      | 34      | 1       | 1       | 15        | 15        |
| HOMO-1   | 26      | 26      | 1       | 1       | 23        | 23        |
| HOMO-2   | 17      | 17      | 25      | 25      | 8         | 8         |

**“End”**
